# Supplementary material for: Genomic Insights Into Plant-Growth-Promoting Potentialities of the Genus Frankia
Source: Front Microbiol. 2019 Jul 4;10:1457. doi: 10.3389/fmicb.2019.01457 (PMC6624747; doi:10.3389/fmicb.2019.01457)
Supplement: Supplementary file 1 [file Table_1.xlsx]

## Sheet: Table S1-Nitrogen-fixation
Genes	function	Frankia alni ACN14a (re-annotation)	QA3	ACN1ag	CpI1-S	CcI3	Thr	Allo2	CeD	BMG5.23	CcI6	BMG5.12	DSM 45899	BCU110501	R43	EUN1f	EAN1pec	CN3	EuI1c	DC12	BMG5.1	Frankia symbiont of Datisca glomerata Dg1
nif	nitrogenase
	4Fe-4S ferredoxin, nitrogenase-associated	0				0						0	0	0				0	0	0	1	1
nifD	Nitrogenase (molybdenum-iron) alpha chain (EC 1.18.6.1)	1				1						1	1	1				0	1	0	1	1
nifK	Nitrogenase (molybdenum-iron) beta chain (EC 1.18.6.1)	1				1						1	1	1				0	1	0	1	1
nifH	Nitrogenase (molybdenum-iron) reductase and maturation protein NifH	1				1						1	1	1				0	1	0	1	1
nifx	Nitrogenase FeMo-cofactor carrier protein NifX	1				1						1	1	1				0	1	0	1	1
nifE	Nitrogenase FeMo-cofactor scaffold and assembly protein NifE	1				1						1	1	1				0	1	0	1	1
nifN	Nitrogenase FeMo-cofactor scaffold and assembly protein NifN	1				1						1	1	1				0	1	0	0	1
nifB	Nitrogenase FeMo-cofactor synthesis FeS core scaffold and assembly protein NifB	1				1						1	1	1				0	1	0	1	1
nifW	Nitrogenase stabilizing/protective protein NifW	1				1						1	1	1				0	1	0	1	1
nifZ	NifZ protein	1				1						1	1	1				0	1	0	1	1
	Cysteine desulfurase (EC 2.8.1.7), NifS subfamily	1				1						0	0	1				0	1	0	0	0
	Cysteine desulfurase (EC 2.8.1.7)	3				3						3	4	3				3	0	0	4	4
	Cysteine desulfurase (EC 2.8.1.7), SufS subfamily	1				1						1	1	1				1	1	1	1	1
	NifX-associated protein	1				1						1	1	1				0	1	0	1	1
	NifU-like domain protein	0				0						0	0	0				0	0	0	1	0
	homocitrate synthase	1				1						1						0	0	0	1	1

## Sheet: Table S2-phosphate regulation
							Cluster 1					Cluster 2				Cluster 3					Cluster 4
				Cluster 1a				Cluster 1c
		ACN14a	QA3	ACN1ag	CpI1	CcI3	Thr	Allo2	CeD	BMG5.23	CcI6	BMG5.1	Dg1	BMG5.12	DSM 45899	BCU110501	R43	EUN1f	EAN1pec	CN3	EuI1c	DC12
Phosphate regulation
phoA	Alkaline phosphatase EC 3.1.3.1	0	0	0	0	0	0	0	0	0	0	0	0	1	0	1	1	0	0	0	0	0
phoD	phosphodiesterase/alkaline phosphatase D	1	1	1	1	1	1	1	1	1	1	1	1	2	3	3	3	3	3	2	1	1
epp	Exopolyphosphatase EC 3.6.1.11	1	1	1	1	2	2	2	2	2	2	2	2	2	2	2	2	2	2	2	2	2
ipp	Inorganic pyrophosphatase EC 3.6.1.1	1	1	1	1	1	1	1	1	1	2	1	1	1	1	1	1	1	1	1	1	1
	Pyrophosphate-energized proton pump (EC 3.6.1.1)	1	1	1	1	1	1	1	1	1	1	1	1	1	1	1	1	1	1	1	1	1
lat	Probable Low-affinity inorganic phosphate transporter	1	1	1	1	0	0	0	0	0	0	0	0	0	1	0	1	1	0	1	0	0
phoB	Phosphate regulon transcriptional regulatory protein PhoB(SphR)	4	5	5	4	5	5	5	5	5	5	4	5	5	4	4	5	3	4	8	6	6
phoH	Phosphate starvation-inducible protein, predicted ATPase	2	2	2	2	2	2	2	2	2	2	2	2	2	2	2	2	2	3	1	2	2
phoR	Phosphate regulon sensor protein EC 2.7.13.3	1	1	1	1	1	1	1	1	1	1	1	1	1	1	1	1	1	1	1	1	1
phoU	Phosphate transport regulator	1	1	1	1	1	1	1	1	1	1	3	2	2	1	1	1	1	1	1	1	1
ppiK	Polyphosphate kinase EC 2.7.4.1	1	1	1	1	1	1	1	1	1	1	1	1	2	1	1	2	2	1	1	1	1
ppgK	Polyphosphate glucokinase EC 2.7.1.63	1	1	1	1	1	1	1	1	1	1	1	1	1	1	1	1	1	1	1	1	1
ppk	Polyphosphate kinase 2 EC 2.7.4.1	1	1	1	1	0	0	0	0	0	0	0	0	1	1	1	1	1	1	0	0	0
ppx	Exopolyphosphatase EC 3.6.1.11	1	1	1	1	2	2	2	2	2	2	2	2	2	2	2	1	2	2	2	2	2
ptsA	Phosphate transport system permease protein TC 3.A.1.7.1	0	0	0	0	1	1	1	1	1	1	1	1	1	1	1	1	1	1	1	1	1
ptsB	Phosphate transport ATP-binding protein TC 3.A.1.7.1	1	1	1	1	1	1	1	1	1	1	1	1	1	1	1	1	1	1	1	1	1
ptsC	Phosphate transport system permease protein TC 3.A.1.7.1	1	1	1	1	2	1	1	1	1	1	1	1	1	1	1	1	1	1	1	1	1
ptsS	Phosphate ABC transporter, periplasmic phosphate-binding protein TC 3.A.1.7.1	3	4	2	2	1	1	1	1	1	1	4	3	2	4	2	1	2	2	2	2	2
THa	Soluble pyridine nucleotide transhydrogenase EC 1.6.1.1	1	1	1	1	1	1	1	1	1	1	1	1	1	1	1	1	1	1	1	1	1
pho	High affinity phosphate transporter and control of PHO regulon	12	14	12	11	13	12	12	12	12	12	16	15	14	14	12	15	12	12	16	14	14
Phosphorus Metabolism		40	41	37	35	41	39	39	39	37	39	45	42	42	43	38	46	38	38	63	55	43
													5

## Sheet: Table S3-Hormone production
							Cluster 1					Cluster 2				Cluster 3					Cluster 4
				Cluster 1a				Cluster 1c
		ACN14a	QA3	ACN1ag	CpI1	CcI3	Thr	Allo2	CeD	BMG5.23	CcI6	BMG5.1	Dg1	BMG5.12	DSM 45899	BCU110501	R43	EUN1f	EAN1pec	CN3	EuI1c	DC12
Hormone production
	2,3-butanediol dehydrogenase, R-alcohol forming, (R)- and (S)-acetoin-specific (EC 1.1.1.4)	0	0	0	0	1	1	1	1	1	1	0	0	1	2	1	1	2	1	2	2	0
adh	Acetoin dehydrogenase E1 component alpha-subunit (EC 1.2.4.-)	1	1	1	1	0	0	0	0	0	0	0	0	1	0	2	0	3	2	5	2	0
	Acetoin dehydrogenase E1 component beta-subunit (EC 1.2.4.-)	1	1	1	1	0	0	0	0	0	0	0	0	1	0	2	0	1	2	3	1	0
alsC	Acetolactate synthase catabolic EC 2.2.1.7 / 1-deoxy-D-xylulose 5-phosphate synthase (EC 2.2.1.7)	1	1	1	1	1	1	1	1	1	1	1	1	1	1	1	1	1	1	1	1	1
alsG	Acetolactate synthase large subunit EC 2.2.1.6	1	1	1	1	1	1	1	1	1	1	1	1	2	4	3	2	2	3	3	3	3
alsS	Acetolactate synthase small subunit EC 2.2.1.6	1	1	1	1	1	1	1	1	1	1	1	1	1	1	1	1	0	1	1	1	1
ACC	1-aminocyclopropane-1-carboxylate deaminase	1	1	1	1	0	0	0	0	0	1	1	1	1	1	0	1	1	0	1	1	0
-	Tryptophan-associated membrane protein	1	1	1	1	1	1	1	1	1	1	1	1	1	1	1	1	1	1	1	1	1
aroA'	2-amino-3,7-dideoxy-D-threo-hept-6-ulosonate synthase EC 2.5.1.-	0	0	0	0	2	2	2	0	1	2	0	0	0	0	0	0	0	0	0	0	0
	Heme O synthase, protoheme IX farnesyltransferase (EC 2.5.1.-) COX10-CtaB	1	1	1	1	1	1	1	1	1	1	1	1	1	1	1	1	1	1	1	1	1
-	3,7-dideoxy-D-threo-hepto-2,6-diulosonate synthase EC 4.2.3.-	0	0	0	0	2	2	1	0	1	1	0	0	0	0	0	0	0	0	0	0	0
-	2-keto-3-deoxy-D-arabino-heptulosonate-7-phosphate synthase II EC 2.5.1.54	1	1	1	1	1	1	1	1	1	1	1	1	1	1	1	1	1	1	1	1	1
-	3-dehydroquinate synthase EC 4.2.3.4	3	2	2	2	2	2	2	2	2	2	1	1	3	2	2	2	1	2	1	1	1
-	Shikimate kinase I EC 2.7.1.71	2	2	2	2	1	1	1	1	1	1	1	1	1	1	1	1	1	1	1	1	1
-	5-Enolpyruvylshikimate-3-phosphate synthase EC 2.5.1.19	1	1	1	1	1	1	1	1	1	1	1	1	1	1	1	1	1	1	1	1	1
-	Chorismate mutase I EC 5.4.99.5	1	0	1	1	1	1	1	1	1	1	1	1	1	1	1	2	1	1	2	2	1
	Chorismate mutase II (EC 5.4.99.5)	0	0	0	0	1	1	1	1	1	1	0	0	0	1	1	0	0	1	0	0	0
-	Isochorismatase EC 3.3.2.1	6	5	6	6	0	0	0	0	0	0	0	0	0	3	2	3	2	2	6	6	4
	Nicotinamidase/isochorismatase family protein	1	1	1	1	1	1	1	1	1	1	0	0	0	0	0	0	0	0	1	0	0
adg	Arogenate dehydrogenase EC 1.3.1.43	2	1	1	1	2	2	2	2	2	2	1	1	1	1	1	2	1	1	2	1	1
CS	Chorismate synthase EC 4.2.3.5	1	1	1	1	1	1	1	1	1	1	2	1	1	1	1	1	1	1	1	1	1
pabAa	Para-aminobenzoate synthase, aminase component EC 2.6.1.85	1	1	1	1	1	1	1	1	1	1	0	1	1	1	1	2	0	1	0	0	0
	Anthranilate synthase, amidotransferase component (EC 4.1.3.27) @ Para-aminobenzoate synthase, amidotransferase component (EC 2.6.1.85)	1	1	1	1	1	1	1	1	1	1	1	1	1	1	1	1	1	1	1	1	1
pabAc	Aminodeoxychorismate lyase EC 4.1.3.38	1	1	1	1	2	2	2	2	2	2	1	1	1	2	1	1	1	1	1	1	1
	2,3-dihydroxy-2,3-dihydro-phenylpropionate dehydrogenase (EC 1.3.1.-)	0	0	0	0	0	0	0	0	0	0	0	0	0	1	0	1	1	0	1	1	0
pdh	Prephenate dehydratase EC 4.2.1.51	2	2	2	2	2	2	2	2	2	2	1	1	3	1	1	2	1	2	2	2	1
phzE	2-Amino-2-deoxy-isochorismate synthase EC 4.1.3.-	1	1	1	1	0	0	0	0	0	0	0	0	1	1	1	1	1	1	2	0	0
	Phosphoribosylformimino-5-aminoimidazole carboxamide ribotide isomerase (EC 5.3.1.16) / Acting phosphoribosylanthranilate isomerase (EC 5.3.1.24)	1	1	1	1	1	1	1	1	1	1	1	1	1	1	1	1	1	1	1	1	1
trpA	Anthranilate synthase, aminase component EC 4.1.3.27	1	1	1	1	1	1	1	1	1	1	1	1	1	1	1	1	1	1	1	1	2
trpB	Anthranilate phosphoribosyltransferase EC 2.4.2.18	2	1	1	1	1	1	1	1	1	1	1	1	2	1	1	1	1	1	1	1	1
trp	Indole-3-glycerol phosphate synthase EC 4.1.1.48	1	1	1	1	1	1	1	1	1	1	1	1	1	1	1	1	1	1	1	1	1
trpEa	Tryptophan synthase alpha chain EC 4.2.1.20	2	1	1	1	1	1	1	1	1	1	1	1	1	1	1	1	1	1	1	1	1
trpEb	Tryptophan synthase beta chain EC 4.2.1.20	2	1	1	1	1	1	1	1	1	1	1	1	1	1	1	1	1	1	1	1	1
IDI	Isopentenyl-diphosphate delta-isomerase (EC 5.3.3.2)	1	1	1	1	2	1	1	1	1	1	1	1	1	1	1	1	1	1	0	1	0
	Octaprenyl diphosphate synthase (EC 2.5.1.90) / Dimethylallyltransferase (EC 2.5.1.1) / (2E,6E)-farnesyl diphosphate synthase (EC 2.5.1.10) / Geranylgeranyl pyrophosphate synthetase (EC 2.5.1.29)	0	2	2	2	1	1	3	1	0	2	2	2	0	1	0	2	2	1	1	0	1
	Octaprenyl diphosphate synthase (EC 2.5.1.90) / Dimethylallyltransferase (EC 2.5.1.1) / Geranyltranstransferase (EC 2.5.1.10) / Geranylgeranyl diphosphate synthase (EC 2.5.1.29)	2	0	0	0	2	2	1	1	2	2	0	0	0	0	0	0	0	1	0	0	0
Genes implicated in trycarboxylic (TCA) acid
gltA	Citrate synthase EC 2.3.3.1	4	4	4	4	2	2	2	2	2	2	2	2	2	2	2	2	2	2	4	5	0
	Homocitrate synthase (EC 2.3.3.14)	1	1	1	1	1	1	1	1	1	1	1	1	1	1	1	2	1	1	0	0	1
acnA	Aconitate hydratase EC 4.2.1.3	1	1	1	1	1	1	1	1	1	1	1	1	1	1	1	1	1	1	1	1	0
sucA	Dihydrolipoamide succinyltransferase component (E2) of 2-oxoglutarate dehydrogenase complex (EC 2.3.1.61) / 2-oxoglutarate dehydrogenase E1 component (EC 1.2.4.2)	1	1	1	1	1	1	1	1	1	1	1	1	1	0	1	0	0	1	1	0	2
lpdA	Dihydrolipoamide dehydrogenase EC 1.8.1.4	3	3	3	3	2	2	2	2	2	2	2	2	4	3	3	3	5	4	1	2	1
sucD	Succinyl-CoA ligase [ADP-forming] alpha chain EC 6.2.1.5	1	1	1	1	1	1	1	1	1	1	1	1	1	1	1	1	1	1	1	1	1
sucC	Succinyl-CoA ligase [ADP-forming] beta chain EC 6.2.1.5	1	1	1	1	1	1	1	1	1	1	1	1	1	1	1	1	1	1	1	1	2
sdhB	Succinate dehydrogenase iron-sulfur protein EC 1.3.99.1	2	2	2	1	2	2	2	2	2	2	2	2	1	1	1	1	1	1	2	2	2
sdhA	Succinate dehydrogenase flavoprotein subunit EC 1.3.99.1	2	3	2	1	2	2	2	2	2	2	3	3	1	1	1	1	1	1	2	2	1
fum	Fumarate hydratase EC 4.2.1.2 / class II (EC 4.2.1.2)	1	1	1	1	1	1	1	1	1	1	1	1	1	1	1	1	1	1	1	1	1
-	Malate dehydrogenase EC 1.1.1.37	1	1	1	1	1	1	1	1	1	1	1	1	1	1	1	0	1	1	2	1	1
icd	Isocitrate dehydrogenase [NADP] EC 1.1.1.42	1	1	1	1	1	1	1	1	1	1	1	1	1	1	1	1	1	1	1	1

## Sheet: Table S4- lytic enzym
							Cluster 1					Cluster 2				Cluster 3					Cluster 4
				Cluster 1a				Cluster 1c
		ACN14a	QA3	ACN1ag	CpI1	CcI3	Thr	Allo2	CeD	BMG5.23	CcI6	BMG5.1	Dg1	BMG5.12	DSM 45899	BCU110501	R43	EUN1f	EAN1pec	CN3	EuI1c	DC12
Degradation enzymes
chiC	Chitinase EC 3.2.1.14	0	0	0	0	1	1	1	1	1	1	0	0	0	1	0	1	2	0	2	1	0
cel	Cellulase EC 3.2.1.4	1	0	1	1	0	0	0	0	0	0	0	0	0	0	0	0	1	0	0	0	1
	Possible Ccellulase CELA1 (ENDOGLUCANASE) (ENDO-1,4-BETA-GLUCANASE) (FI-CMCASE) (CARBOXYMETHYL CELLULASE) (EC 3.2.1.4)	1	1	1	1	0	0	0	0	0	0	1	2	0	1	2	1	2	2	0	0	1
	Endoglucanase	2	0	0	1	0	0	2	0	1	1	1	1	1	1	0	0	0	0	2	0	0
	extracellular endoglucanase precursor	0	0	0	0	0	0	0	0	0	0	0	0	1	1	1	1	1	1	1	0	0
PL	Pectate lyase EC 4.2.2.2	0	0	0	0	0	0	0	0	0	0	0	0	2	0	1	0	1	1	1	0	0
hrpW	Type III effector HrpW, hairpin with pectate lyase domain	0	0	0	0	0	0	0	0	0	0	0	0	1	0	0	0	0	0	0	0	0
-	Glucoamylase EC 3.2.1.3	4	3	4	4	3	3	3	3	3	3	4	3	3	3	3	3	3	3	3	3	3
OtsB	Trehalose-6-phosphate phosphatase (EC 3.1.3.12)	1	1	1	1	1	1	1	1	1	1	1	1	1	1	1	1	1	1	1	1	1
pgm	ß-phosphoglucomutase EC 5.4.2.6	1	1	1	1	1	1	1	1	1	1	1	1	1	1	1	1	1	1	1	1	1
	Phosphoglucomutase (EC 5.4.2.2)	1	1	1	1	1	1	1	1	1	1	2	1	1	1	1	1	1	1	1	1	1
	Maltose phosphorylase (EC 2.4.1.8) / Trehalose phosphorylase (EC 2.4.1.64)	1	1	1	1	1	1	1	1	1	1	1	1	1	1	1	1	1	1	1	1	1

## Sheet: Table S5-siderophores
		Cluster 1										Cluster 2		Cluster 3							Cluster 4
		Cluster 1a				Cluster 1c
		ACN14a	QA3	ACN1ag	CpI1	CcI3	Thr	Allo2	CeD	BMG5.23	CcI6	BMG5.1	Dg1	BMG5.12	DSM 45899	BCU110501	R43	EUN1f	EAN1pec	CN3	EuI1c	DC12
Siderophores
-	Siderophore biosynthesis diaminobutyrate--2-oxoglutarate aminotransferase EC 2.6.1.76	1	1	1	1	1	1	1	1	1	1	1	1	1	1	1	1	1	1	0	0	0
-	2,3-dihydroxybenzoate-AMP ligase EC 2.7.7.58	2	1	1	1	0	0	0	0	0	0	1	0	3	2	0	2	1	4	1	1	2
-	Siderophore biosynthesis non-ribosomal peptide synthetase modules	3	4	5	4	3	4	1	3	4	5	3	1	3	8	0	7	2	3	2	3	3
	Siderophore biosynthesis protein, monooxygenase	2	1	1	1	1	1	1	1	1	1	1	1	1	2	1	1	1	2	0	0	0
	Siderophore biosynthesis L-2,4-diaminobutyrate decarboxylase	1	1	1	1	1	1	1	1	1	1	2	1	1	1	1	1	1	1	0	0	0
-	Putative ABC iron siderophore transporter, fused permease and ATPase domains	2	1	1	1	1	1	1	1	1	1	1	0	1	2	1	1	1	4	2	2	1
	ABC-type siderophore export system, fused ATPase and permease components	0	0	1	1	0	0	0	0	0	0	0	0	0	0	0	0	0	0	0	0	0
-	ABC-type Fe3+-siderophore transport system, permease component	1	1	2	2	0	0	0	0	0	0	1	1	1	3	1	3	1	2	2	1	1
-	ABC-type Fe3+-siderophore transport system, ATPase component	1	1	2	2	0	0	0	0	0	0	1	1	1	2	1	2	1	2	2	1	1
-	ABC-type Fe3+-siderophore transport system, permease 2 component	1	1	2	2	0	0	0	0	0	0	2	1	1	3	1	3	1	2	2	1	1
	ABC-type Fe3+-hydroxamate transport system, periplasmic component	1	1	1	1	1	1	1	1	1	1	1	1	1	1	1	1	1	1	1	1	1
feat	Iron chelator utilization protein	2	3	1	1	1	1	1	1	1	1	0	0	3	3	1	3	2	3	2	1	1
icm	Isochorismatase EC 3.3.2.1	6	5	6	6	0	0	0	0	0	0	0	0	0	3	2	3	2	2	6	6	4
iucA	Siderophore synthetase large component, acetyltransferase	1	1	1	1	0	0	0	0	0	0	0	0	1	1	1	1	1	1	0	0	0
	Siderophore synthetase superfamily, group A @ Siderophore synthetase large component, acetyltransferase	0	0	0	0	1	1	1	1	1	1	1	1	0	0	0	0	0	0	0	0	0
	Siderophore synthetase component, ligase	1	1	1	1	1	1	1	1	1	1	1	2	1	1	1	1	1	1	0	0	0
	Thioesterase	1	1	1	1	0	0	0	0	0	0	0	0	1	0	0	1	1	0	0	1	0
	Thioesterase type II	0	0	0	0	1	1	1	1	1	1	0	0	0	0	0	0	1	0	0	0	0
	putative thioesterase	0	0	0	0	1	1	1	1	1	1	2	1	3	1	0	1	1	0	0	0	0
pchC	Thioesterase in siderophore biosynthesis gene cluster	2	0	0	0	0	0	0	0	0	0	0	1	0	0	0	1	0	1	1	1	0
-	Isochorismatase EC 3.3.2.1 of siderophore biosynthesis	0	0	0	0	0	0	0	0	0	0	0	0	1	1	0	2	0	1	0	0	0

## Sheet: Table S6-stress related gene
		Cluster 1										Cluster 2		Cluster 3							Cluster 4
		Cluster 1a				Cluster 1c
		ACN14a	QA3	ACN1ag	CpI1	CcI3	Thr	Allo2	CeD	BMG5.23	CcI6	BMG5.1	Dg1	BMG5.12	DSM 45899	BCU110501	R43	EUN1f	EAN1pec	CN3	EuI1c	DC12
Stress related genes
-	Signal peptidase-like protein	1	0	0	1	1	1	1	1	1	1	1	1	1	1	1	1	1	1	1	1	1
-	Ferroxidase EC 1.16.3.1	1	1	1	1	1	1	1	1	1	1	1	1	1	1	1	1	1	1	1	1	1
-	Hydrogen peroxide-inducible genes activator	1	1	1	1	1	1	1	1	1	1	0	0	1	1	1	1	1	1	1	0	0
-	Organic hydroperoxide resistance protein	1	1	1	2	1	1	1	0	1	1	1	1	1	1	1	1	1	1	1	1	1
	Organic hydroperoxide resistance transcriptional regulator	1	1	1	1	0	0	0	0	0	0	0	0	1	1	0	1	1	1	1	1	1
ahpC	Alkyl hydroperoxide reductase subunit C-like protein	3	2	4	3	1	1	1	1	1	1	2	1	4	3	3	4	4	4	2	4	3
aqpZ	Aquaporin Z	1	1	2	2	1	1	1	1	1	1	1	1	2	2	1	2	2	1	2	2	2
betA	Choline dehydrogenase EC 1.1.99.1	0	3	0	0	0	0	0	0	0	0	1	0	0	1	0	1	1	1	1	1	1
betB	Betaine aldehyde dehydrogenase EC 1.2.1.8	0	0	0	0	0	0	0	0	0	0	0	0	0	0	0	0	0	0	0	0	0
betC	Choline sulfatase EC 3.1.6.6	0	0	0	0	0	0	0	0	0	0	0	4	0	1	0	1	2	2	0	0	0
betI	HTH-type transcriptional regulator	0	0	0	0	0	0	0	0	0	0	0	0	0	0	0	0	0	0	0	0	0
	HTH-type transcriptional regulator celR	0	0	0	0	0	0	0	0	0	0	0	0	1	1	1	1	1	1	2	2	1
bphO	Bacteriophytochrome heme oxygenase	1	1	1	1	0	0	0	0	0	0	0	0	0	1	0	1	1	0	0	0	0
cspA	Cold shock protein A	3	3	3	3	2	2	2	2	2	2	2	2	3	2	3	2	2	3	3	4	4
cspC	Cold shock protein C	1	1	1	1	1	1	1	1	1	1	1	1	1	1	1	1	1	1	1	1	1
cspG	Cold shock protein G	0	1	0	0	0	0	0	0	0	0	0	0	0	0	0	0	0	1	1	0	0
cstA	Carbon starvation protein	0	0	0	0	1	1	1	1	1	1	0	0	0	1	0	1	1	0	1	1	0
dnaJ	Chaperon protein dnaJ family	4	3	2	2	2	2	2	2	2	2	3	3	2	2	2	2	2	2	3	4	3
	possible DnaJ	0	0	0	0	0	0	0	0	0	0	0	0	1	1	1	1	2	2	0	0	0
	DnaJ-class molecular chaperone CbpA	2	4	2	2	2	2	2	2	2	2	0	0	2	1	2	1	2	1	1	1	0
dnaK	Chaperon protein	7	9	9	9	4	4	5	4	5	5	5	3	7	7	6	8	8	7	7	9	6
	HspR, transcriptional repressor of DnaK operon	3	4	3	3	2	2	2	2	2	2	1	1	2	2	4	2	6	1	4	3	1
	putative suppressor protein DnaK	1	0	1	1	0	0	0	0	0	0	0	0	0	0	0	0	0	0	0	1	1
Fe3+	ABC-type Fe3+-siderophore transport system, ATPase component	1	1	2	2	0	0	0	0	0	0	1	1	1	2	1	2	1	2	2	1	1
Fe3+	ABC-type Fe3+-siderophore transport system, permease component	1	1	2	2	0	0	0	0	0	0	1	1	1	3	1	3	1	2	2	1	1
	ABC-type Fe3+-siderophore transport system, permease 2 component	1	1	2	2	0	0	0	0	0	0	2	1	1	3	1	3	1	2	2	1	1
fnr	Transcriptional regulator crp/fnr family	3	1	3	3	0	0	0	0	0	0	0	0	1	1	2	2	1	1	1	2	1
fur	Transcriptional regulator, FUR family	1	1	0	0	0	0	0	0	0	0	4	4	2	2	2	2	2	2	2	2	2
fur	Peroxide stress regulator PerR, FUR family	1	1	1	1	1	1	1	1	1	1	1	1	1	1	1	1	1	1	1	1	1
fur	Ferric uptake regulation protein FUR	1	1	1	1	1	1	0	1	1	1	0	0	0	1	1	2	0	0	0	0	0
grpE	Heat shock protein	2	3	2	2	2	2	2	2	2	2	1	1	2	3	3	2	2	3	2	2	2
	Heat shock protein 60 family chaperone GroEL	4	3	4	3	4	4	4	4	4	4	2	2	3	3	4	3	3	4	2	2	2
	Heat shock protein 60 family co-chaperone GroES	2	2	2	2	2	2	2	2	2	2	2	2	2	2	2	2	2	2	2	2	2
	HEAT SHOCK PROTEIN HSP	1	1	1	1	1	1	1	1	1	1	0	1	1	1	1	1	1	1	1	1	1
	Heat shock protein, Hsp20 family	1	2	0	0	2	2	2	2	2	2	0	0	0	2	1	2	0	1	1	0	0
hmpX	Flavohemoglobin nitric oxide dioxygenase	1	1	1	1	0	0	0	1	1	0	0	0	0	0	0	1	1	0	0	0	0
hrcA	Heat-inducible transcription repressor	1	1	0	1	1	1	1	1	1	1	1	1	1	1	1	1	1	1	1	1	1
hspR	Transcriptional repressor of dnaK operon	3	4	3	3	2	2	2	2	2	0	1	1	2	2	1	2	6	1	4	3	1
lepA	Translation elongation factor LepA	1	1	1	1	1	1	1	1	1	1	2	1	1	1	1	1	1	1	1	1	1
	Translation elongation factor P	1	1	1	1	1	1	1	1	1	1	1	1	1	1	1	1	1	1	1	1	1
	Translation elongation factor Ts	1	1	1	1	1	1	1	1	1	1	1	1	1	1	1	1	1	1	1	1	1
	Translation elongation factor Tu	1	1	1	1	1	1	1	1	1	1	1	1	1	1	1	1	1	1	2	2	1
	Translation elongation factor G	1	1	1	1	1	1	1	1	1	1	1	1	1	1	1	1	1	1	2	1	1
	Translation elongation factor G-related protein	1	1	1	1	1	1	1	1	1	1	1	1	1	1	1	1	1	1	1	1	1
nor	Nitric oxide reductase activation protein NorE	0	0	0	0	0	0	0	0	0	0	1	1	0	0	0	0	0	0	0	0	0
	Nitric oxide reductase activation protein NorQ	0	0	0	0	0	0	0	0	0	0	0	0	0	1	0	1	1	1	0	0	0
	Nitric oxide reductase activation protein NorD	0	0	0	0	0	0	0	0	0	0	0	0	0	1	0	1	1	1	0	0	0
nsrR	Nitrite-sensitive transcriptional repressor	0	0	0	0	1	1	1	1	0	1	0	0	0	0	0	0	0	0	0	0	0
ompA	Outer membrane protein A precursor	1	1	1	1	1	1	1	1	1	1	0	1	2	2	2	2	2	2	1	1	1
opuA	Glycine betaine ABC transporter	0	0	0	0	0	0	0	0	0	0	0	0	0	0	1	0	0	1	0	0	1
	Phytochrome, two component sensor histidine kinase (EC 2.7.3.-); cyanobacterial phytochrome 1	1	1	1	1	1	1	1	1	1	1	0	0	1	1	2	1	1	1	1	1	0
PCh	Phytochrome, two component sensor histidine kinase (EC 2.7.3.-)	1	1	1	1	0	0	0	0	0	0	0	0	2	0	0	1	0	0	0	0	0
proX	L-proline glycine betaine binding ABC transporter protein	1	0	1	1	0	0	0	0	0	0	0	0	1	2	1	2	2	1	1	2	2
cat	Catalase	2	1	0	1	2	2	3	2	3	2	1	1	2	1	1	1	0	2	1	2	1
prx cat	Catalase Peroxidase	0	0	0	0	0	0	0	0	0	0	2	1	0	1	1	1	1	1	1	1	1
rdgB	Nucleoside 5-triphosphatase EC 3.6.1.15	1	1	1	1	1	1	1	0	1	1	1	1	1	1	1	1	1	1	1	1	1
rex	Redox-sensitive transcriptional regulator	1	1	1	1	1	1	1	1	1	1	1	1	1	1	1	1	1	1	1	1	1
SoxR	Redox-sensitive transcriptional activator SoxR	1	1	1	1	1	1	1	1	1	1	1	1	1	1	1	1	1	1	1	1	1
RNAse	Ribonuclease PH EC 2.7.7.56	1	1	1	1	1	1	1	1	1	1	1	1	1	1	1	1	1	1	1	1	1
rsmH	rRNA small subunit methyltransferase H	1	1	1	1	1	1	1	1	1	1	1	1	1	1	1	1	1	1	1	1	4
rsmI	rRNA small subunit methyltransferase I	1	1	0	1	2	2	2	2	2	2	1	1	1	1	1	1	1	1	1	1	1
RTH	Rubrerythrin	1	1	1	1	2	2	1	1	1	1	1	1	1	2	1	3	1	1	1	1	1
SAM	Hypothetical radical SAM family enzyme in heat shock gene cluster, similarity with CPO of BS HemN-type	2	2	2	2	1	1	1	1	1	1	1	1	1	2	1	2	2	1	1	1	1
	Hypothetical radical SAM family enzyme in interesting gene cluster	0	0	0	0	0	0	0	0	0	0	0	0	1	1	0	1	1	0	0	0	0
smpB	tmRNA binding protein	1	1	1	1	1	1	1	1	1	1	1	1	1	1	1	1	1	1	1	1	1
sod	Superoxide dismutase [Mn/Fe] (EC 1.15.1.1)	1	1	1	1	1	1	1	1	1	1	1	1	1	1	1	2	1	1	0	0	0
	Superoxide dismutase [Cu-Zn] precursor (EC 1.15.1.1)	0	0	0	0	0	0	0	0	0	0	0	0	1	1	1	1	1	1	0	0	0
	Nickel-dependent superoxide dismutase (EC 1.15.1.1)	0	0	0	0	0	0	0	0	0	0	1	1	1	1	1	1	1	1	1	1	1
soxR	Redox-sensitive transcriptional activator	1	1	1	1	1	1	1	1	1	1	1	1	1	1	1	1	0	1	1	1	1
soxR	Redox-sensitive transcriptional regulator (AT-rich DNA-binding protein)	1	1	1	1	1	1	0	1	1	1	1	1	1	1	1	1	1	1	1	1	1
zur	Zinc uptake regulator protein	1	1	1	1	1	1	1	1	1	1	1	2	1	1	1	1	1	1	1	1	2
thb	NAD(P) transhydrogenase subunit beta EC 1.6.1.2	0	0	0	0	3	3	3	3	1	3	0	0	0	0	0	0	0	0	6	3	3
DNA repair related genes
uvrA	Excinuclease ABC subunit A	1	0	1	1	2	1	1	2	2	1	1	1	1	1	1	1	1	1	1	1	1
uvrB	Excinuclease ABC subunit B	1	1	1	1	1	1	1	1	1	1	1	1	1	1	1	1	1	1	1	1	1
uvrC	Excinuclease ABC subunit C	1	1	1	1	1	1	1	1	1	1	1	1	1	1	1	1	1	1	1	1	1
uvrA-para	Excinuclease ABC subunit A paralog of unknown function	1	1	1	1	1	1	1	1	1	1	1	1	1	1	1	1	1	1	2	1	1
uvrD	ATP-dependent DNA helicase	0	0	1	1	1	1	1	1	0	1	2	2	1	1	0	2	2	2	0	1	5
	ATP-dependent DNA helicase UvrD/PcrA	2	2	3	2	2	2	2	2	2	2	3	2	3	2	2	2	2	2	2	2	2
	ATP-dependent DNA helicase UvrD/PcrA, actinomycete paralog	1	1	1	1	1	1	1	1	1	1	1	1	1	1	1	1	1	1	1	1	1
uvrD-actino	ATP-dependent DNA helicase, actinomycete paralog	0	0	0	0	0	0	0	0	0	0	0	0	0	0	0	0	0	0	0	0	0
	ATP-dependent DNA helicase rep (EC 3.6.1.-)	0	0	1	0	0	0	0	0	0	0	0	0	0	0	0	0	0	0	2	1	1
yoaA	DinG family ATP-dependant helicase	0	0	0	0	0	0	0	0	0	0	0	0	0	0	0	0	0	0	0	0	0
recA	RecA protein	1	1	1	1	1	1	1	1	1	1	1	1	1	1	1	1	1	3	1	1	1
recB	Exodeoxyribonuclease V beta chain EC 3.1.11.5	0	0	0	0	0	0	0	0	0	0	0	0	0	0	0	0	0	0	0	0	0
	RecB family exonuclease	2	2	2	2	2	2	2	2	2	2	2	2	2	2	2	2	2	2	2	2	2
	CRISPR-associated RecB family exonuclease Cas4a	1	1	1	1	0	0	0	0	0	0	1	0	0	1	0	0	1	1	0	0	0
	CRISPR-associated RecB family exonuclease Cas4	0	0	0	0	1	1	0	0	1	0	0	0	0	0	0	0	0	0	0	0	0
recX	Regulatory protein	1	1	1	1	1	1	1	1	1	1	1	1	1	1	1	1	1	1	1	1	1
recF	DNA recombination and repair protein	1	1	1	1	1	1	1	1	1	1	1	1	1	1	1	1	1	1	1	1	1
recG	ATP-dependent DNA helicase EC 3.6.1.-	1	1	1	1	1	1	1	1	1	1	1	1	1	1	1	1	1	1	0	1	1
recN	DNA repair protein	1	1	1	1	1	1	1	1	1	1	1	1	1	1	1	1	1	1	1	1	1
recO	DNA recombination and repair protein	1	1	1	1	1	1	1	1	1	1	1	1	2	1	1	1	1	1	1	1	1
recQ	ATP-dependent DNA helicase RecQ	3	3	3	3	1	1	1	1	1	1	1	1	3	2	4	1	2	3	4	4	2
recR	Recombination protein	1	1	1	1	1	1	1	1	1	1	1	1	1	1	1	1	1	1	1	1	1
	hypothetical protein co-occurring with RecR	2	2	2	2	2	2	2	2	2	2	1	1	2	2	2	2	2	2	2	3	2
ssb	Single-stranded DNA-binding protein	2	2	2	4	2	2	2	1	3	2	3	5	3	2	1	5	4	3	1	3	1
	RecD-like DNA helicase YrrC	2	3	2	2	2	2	2	2	2	2	2	2	2	2	2	2	2	3	2	2	4
-	ATP dependent helicase SCO5183 / ATP-dependent DNA helicase SCO5183	1	1	1	1	1	1	1	1	1	1	1	1	1	1	1	1	1	1	2	1	2
-	ATP dependent helicase SCO5184 / ATP-dependent DNA helicase SCO5184	1	1	1	1	1	1	1	1	1	1	1	1	1	1	1	1	1	1	1	1	1
radA	DNA repair protein	1	1	1	1	1	1	1	1	1	1	1	1	1	1	1	1	1	1	1	1	1
sbcC	Exonuclease	1	4	2	2	1	1	1	1	1	1	3	1	0	1	1	2	1	0	3	2	3
sbcD	Exonuclease	1	1	1	1	1	1	1	1	1	1	2	1	0	1	0	1	1	1	2	2	2
	Endonuclease/exonuclease/phosphatase	2	1	2	2	3	3	3	2	2	3	0	1	1	3	1	3	2	2	1	2	2
	Probable 5'-3' exonuclease Bsu YpcP	1	0	1	1	1	1	1	1	1	1	0	0	1	0	1	0	0	1	0	0	0
xseA	Exodeoxyribonuclease VII large subunit EC 3.1.11.6	1	1	1	1	1	1	1	1	1	1	1	1	1	1	1	1	1	1	1	1	1
xseB	Exodeoxyribonuclease VII small subunit EC 3.1.11.6	1	1	1	1	1	1	1	1	1	1	1	1	1	1	1	1	1	1	1	1	1
lexA	SOS-response repressor and protease LexA EC 3.4.21.88	1	1	1	1	1	1	1	1	1	1	1	1	2	1	1	1	4	1	1	1	1
dinP	DNA polymerase IV EC 2.7.7.7	1	1	1	1	0	0	0	1	0	1	0	0	1	1	1	1	1	1	1	1	1
EndoIV	Endonuclease IV (EC 4.2.21.2)	0	0	0	0	0	0	0	0	0	0	0	0	0	0	0	0	0	0	0	0	0
EndoV	Endonuclease V (EC 4.2.21.7)	0	0	0	0	0	0	0	0	0	0	0	0	0	0	0	0	0	1	0	0	0
	Endonuclease V (EC 3.1.21.7)	0	0	0	0	0	0	0	0	0	0	0	0	0	1	1	1	1	1	2	0	0
ExoIII	Exodeoxyribonuclease III EC 3.1.11.2	1	1	1	1	2	2	3	1	2	3	1	1	2	2	3	2	2	2	2	1	1
ogt	Methylated-DNA--protein-cysteine methyltransferase EC 2.1.1.63	3	3	3	3	2	2	2	2	2	2	1	1	2	2	2	2	2	2	3	4	5
rmuC	DNA recombination protein	1	1	1	1	1	1	1	1	1	1	1	1	0	0	0	0	0	0	1	1	1
alkB	Alkylated DNA repair protein	1	1	1	1	1	1	1	1	1	1	0	0	1	1	1	1	1	0	1	1	1
	putative alkylated DNA repair protein	1	1	0	1	1	1	1	1	1	1	2	2	1	1	1	1	1	1	1	2	1
-	Very-short-patch mismatch repair endonuclease (G-T specific)	0	0	0	0	0	0	1	0	0	1	0	0	1	0	0	0	0	0	0	2	0
mutY	A/G-specific adenine glycosylase EC 3.2.2.-	1	1	1	1	1	1	1	1	1	1	1	1	1	1	1	1	1	1	1	1	1
mug	G:T/U mismatch-specific uracil/thymine DNA-glycosylase	1	1	1	1	1	1	1	1	1	1	0	0	1	1	1	1	1	1	1	1	1
ku	KU domain protein	1	1	1	1	1	1	1	1	1	1	1	1	0	1	0	1	1	2	1	1	1
ligC	ATP-dependent DNA ligase EC 6.5.1.1	1	0	0	0	0	0	0	0	0	0	0	0	0	1	1	1	2	1	1	1	1
	ATP-dependent DNA ligase (EC 6.5.1.1) clustered with Ku protein, LigD	2	1	0	0	0	0	0	0	0	0	0	0	0	1	0	1	1	0	1	2	2
lig1	ATP-dependent DNA ligase EC 6.5.1.1	0	0	0	0	0	0	0	0	0	0	1	0	2	2	1	2	0	0	0	0	1
lig2	DNA ligase EC 6.5.1.2	1	0	1	1	1	1	1	1	1	1	1	1	1	1	1	1	1	1	1	1	1
gly1	Formamidopyrimidine-DNA glycosylase (EC 3.2.2.23)	4	3	1	1	1	1	1	1	1	1	1	1	4	4	3	4	4	3	4	4	3
gly2	Uracil-DNA glycosylase, family 1	0	0	0	0	1	1	1	1	0	1	0	0	1	1	1	1	1	1	1	1	1
	Uracil-DNA glycosylase, family 5	1	1	1	1	1	1	1	1	1	1	1	1	1	1	1	1	1	1	1	1	1
	Uracil-DNA glycosylase, putative family 6	1	1	1	1	1	1	1	1	1	1	1	1	0	0	0	0	0	0	0	0	0
gly3	DNA-3-methyladenine glycosylase (EC 3.2.2.20)	1	1	1	1	1	1	1	1	1	1	0	1	1	1	1	1	1	1	1	1	1
gly4	DNA-3-methyladenine glycosylase II (EC 3.2.2.21)	1	1	1	1	1	1	1	1	1	1	1	1	1	2	1	2	2	1	1	2	1
	Endonuclease (EC 3.1.-.-)	1	1	1	1	1	1	1	1	1	1	1	1	1	1	1	1	1	1	2	2	1
end1	Endonuclease III (EC 4.2.99.18)	1	1	1	1	2	2	1	1	1	1	1	1	1	1	1	1	1	1	1	1	1
pol1	DNA polymerase I EC 2.7.7.7	2	3	2	2	1	1	1	1	1	1	3	3	2	3	3	4	4	2	3	3	4
dam	DNA adenine methylase (EC 2.1.1.72)	0	0	0	0	0	0	0	0	0	0	1	1	0	0	0	0	0	0	0	0	0
	Type I restriction-modification system, DNA-methyltransferase subunit M (EC 2.1.1.72)	3	3	4	3	2	2	2	2	1	2	1	1	2	0	1	1	1	2	1	0	9
	Adenine-specific methyltransferase (EC 2.1.1.72)	0	0	0	2	1	1	1	1	1	1	2	0	0	0	1	1	0	0	1	0	1
ada	ADA regulatory protein	0	0	0	0	0	0	0	0	0	0	0	0	0	0	0	0	0	0	0	0	0
dcm	DNA-cytosine methyltransferase 2.1.1.37	1	0	0	0	0	0	2	0	0	2	0	0	1	0	1	0	4	0	2	3	1
	Phosphoglycolate phosphatase, archaeal type EC 3.1.3.18	1	1	1	1	1	1	1	1	1	1	1	1	1	1	1	1	1	1	1	1	1
	putative phosphatase	1	1	1	1	0	0	0	0	0	0	0	0	1	2	0	2	0	0	2	1	1
yniC	2-deoxyglucose-6-phosphate hydrolase	1	2	0	0	0	0	0	0	0	0	0	0	1	1	1	1	1	1	1	1	1
Photosynthesis
crtA	Spheroidene monooxygenase	1	1	1	1	1	1	1	1	1	1	0	0	1	1	1	1	1	1	0	1	1
crtB	Phytoene synthase EC 2.5.1.32	2	3	1	1	2	1	1	1	1	1	3	3	1	1	1	1	3	2	3	3	3
crtI	Phytoene dehydrogenase EC 1.14.99.-	3	2	2	2	2	2	2	2	2	2	0	0	1	1	1	1	1	2	2	2	2
	Phytoene dehydrogenase and related proteins	1	0	1	1	1	1	1	1	1	1	0	0	1	1	1	1	1	1	1	1	1
	Methoxyneurosporene dehydrogenase (EC 1.14.99.-)	0	0	0	0	0	0	0	0	0	0	0	0	1	1	1	1	1	1	0	0	0
crtO	ß-carotene ketolase EC 1.14.-.-	2	1	0	0	0	0	0	0	0	0	0	0	0	0	0	0	0	1	1	1	1
crtY	Lycopene cyclase	2	2	2	2	2	2	2	2	2	2	0	0	2	2	2	2	2	2	2	2	2
ispB	Octaprenyl diphosphate synthase (EC 2.5.1.90) / Dimethylallyltransferase (EC 2.5.1.1) / (2E,6E)-farnesyl diphosphate synthase (EC 2.5.1.10) / Geranylgeranyl pyrophosphate synthetase (EC 2.5.1.29)	0	2	2	2	1	1	3	1	0	2	3	2	2	2	2	2	2	1	1	1	1
	Octaprenyl diphosphate synthase (EC 2.5.1.90) / Dimethylallyltransferase (EC 2.5.1.1) / Geranyltranstransferase (EC 2.5.1.10) / Geranylgeranyl diphosphate synthase (EC 2.5.1.29)	2	0	0	0	2	2	1	1	2	2	0	0	0	0	0	0	0	1	0	0	0
Stress Response		146	133	129	130	102	99	96	89	99	94	114	99	143	165	146	179	167	146	157	162	108
	Osmotic stress	7	2	8	8	3	3	3	3	3	3	1	2	7	11	9	11	11	9	9	11	11
	Osmoregulation	2	2	3	3	2	2	2	2	2	2	1	2	4	4	3	4	4	3	4	3	3
	Synthesis of osmoregulated periplasmic glucans	1	0	1	1	1	1	1	1	1	1	0	0	2	2	2	2	1	0	0	2	1
	Choline and Betaine Uptake and Betaine Biosynthesis	4	0	4	4	0	0	0	0	0	0	0	0	1	5	4	5	6	6	5	6	7
	Oxidative stress	55	49	51	51	46	44	43	37	44	41	46	35	61	64	57	71	64	60	54	57	45
	NADPH:quinone oxidoreductase 2	2	3	2	2	0	0	0	0	0	0	2	0	4	3	3	4	4	2	1	0	0
	Glutathione: Biosynthesis and gamma-glutamyl cycle	0	0	0	0	1	0	0	0	0	0	1	0	0	0	0	0	0	1	1	1	0
	Glutathione: Non-redox reactions	3	3	3	3	1	1	1	1	1	1	4	2	1	3	1	3	3	1	3	2	1
	Redox-dependent regulation of nucleus processes	5	5	5	5	5	5	4	0	4	4	0	0	5	6	5	7	5	5	4	4	4
	Glutaredoxins	1	1	1	1	0	0	0	1	1	0	0	0	0	1	1	1	1	0	0	1	0
	Glutathione analogs: mycothiol	11	10	10	10	11	11	11	11	11	11	10	9	15	14	12	16	17	15	13	15	13
	Oxidative stress	25	21	23	23	19	19	19	17	19	18	21	19	26	27	25	30	25	24	23	24	20
	Protection from Reactive Oxygen Species	2	1	1	1	3	3	4	3	4	3	5	3	4	5	4	5	5	5	4	5	3
	Rubrerythrin	4	3	4	4	3	3	2	2	2	2	3	2	4	5	4	5	4	4	5	5	4
	Cluster containing Glutathione synthetase	2	2	2	2	3	2	2	2	2	2	0	0	2	0	2	0	0	3	0	0	0
	Cold shock	4	5	4	4	3	3	3	3	3	3	3	3	4	3	4	3	3	5	5	5	5
	Cold shock, CspA family of proteins	4	5	4	4	3	3	3	3	3	3	3	3	4	3	4	3	3	5	5	5	5
	Heat shock	27	30	27	27	23	22	23	20	23	23	22	18	23	25	25	27	30	25	28	29	20
	Heat shock dnaK gene cluster extended	27	30	27	27	23	22	23	20	23	23	22	18	23	25	25	27	30	25	28	29	20
	Detoxification	19	16	13	14	14	14	14	11	12	15	9	12	14	16	13	18	18	16	18	17	15
	Uptake of selenate and selenite	9	4	3	14	2	2	2	2	2	2	1	2	2	4	3	4	4	3	7	4	3
	Tellurite resistance: Chromosomal determinants	0	0	0	0	0	0	0	0	0	0	0	0	0	0	0	0	0	0	0	1	0
	Stress Response - no subcategory	43	43	36	36	24	24	21	23	23	21	39	38	45	58	47	62	54	43	53	54	24
	Flavohaemoglobin	2	2	3	3	0	0	0	1	1	0	0	0	0	4	2	5	2	0	0	2	0
	SigmaB stress responce regulation	29	26	21	21	17	17	16	16	16	16	23	21	22	22	27	23	23	21	29	24	12
	Dimethylarginine metabolism	2	0	2	2	2	2	0	0	0	0	2	2	2	3	2	3	2	2	0	0	0
	Bacterial hemoglobins	9	14	9	9	3	3	3	4	4	3	13	14	20	26	15	28	23	19	22	26	11
	Hfl operon	1	1	1	1	1	1	1	1	1	1	1	1	1	1	1	1	1	1	1	1	1
	Carbon Starvation	0	0	0	0	1	1	1	1	1	1	0	0	0	2	0	2	3	0	1	1	0
	Periplasmic Stress	1	0	0	0	1	1	1	1	1	1	2	1	1	0	1	1	1	1	1	1	0
	Periplasmic Stress Response	1	0	0	0	1	1	1	1	1	1	2	1	1	0	1	1	1	1	1	1	0
